# Supplementary material
Source: publisher site journal article supplement (https://www.spandidos-publications.com/2781/downloadSupplementary)

Figure S1. The increased multiple of IL-1 $\beta$ , IL-6, TNF- $\alpha$  stimulated by LPS between GFs from AgP and GFs from healthy subjects. (A) There is a significant difference in the increased multiple of IL-1 $\beta$  stimulated by LPS between GFs from AgP and GFs from healthy subjects (\*P<0.05). (B) There is a significant difference in the increased multiple of IL-6 stimulated by LPS between GFs from AgP and GFs from healthy subjects (\*P<0.05). (C) There is a significant difference in the increased multiple of TNF- $\alpha$  stimulated by LPS between GFs from AgP and GFs from healthy subjects (\*P<0.05). IL, interleukin; LPS, lipopolysaccharide; GFs, gingival fibroblasts; AgP, aggressive periodontitis; TNF- $\alpha$ , tumor necrosis factor- $\alpha$ ; HGFs, GFs from healthy subjects; AGFs, GFs from patients with aggressive periodontitis.

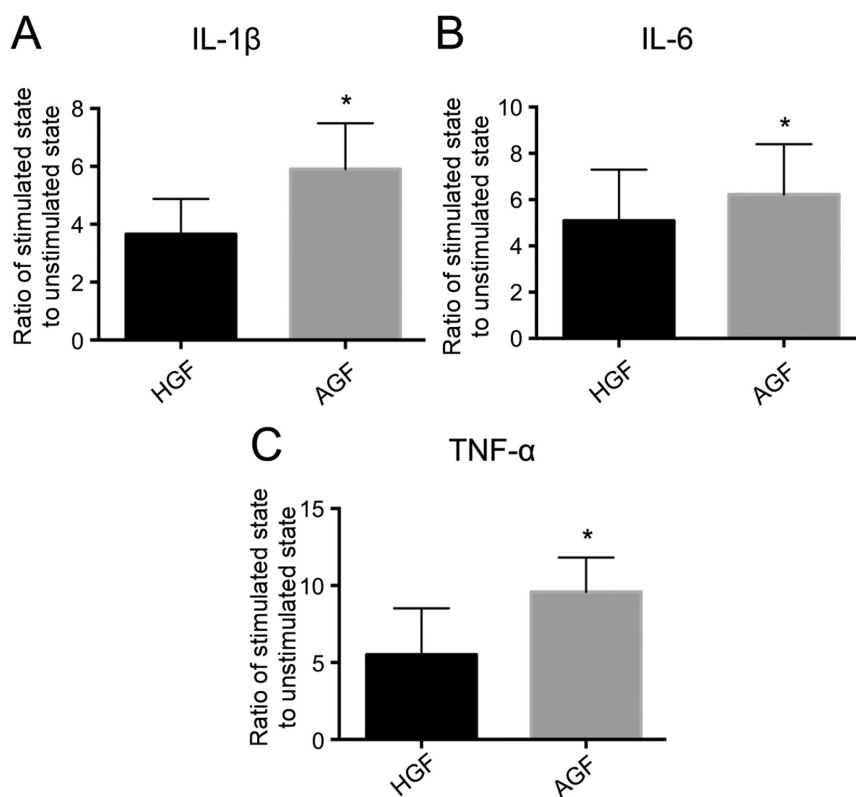

Supplement: Supplementary file 1 [file downloadSupplementary]
